# Supplementary material for: Giant rotating magnetocaloric effect induced by highly texturing in polycrystalline DyNiSi compound
Source: PubMed Central journal article supplement (PMC5155619; doi:10.1038/srep11929), 2015-07-10
Supplement: srep11929-s1.pdf [file srep11929-s1.pdf]

# **Giant rotating magnetocaloric effect induced by highly texturing in polycrystalline DyNiSi compound**

Hu Zhang,<sup>1,\*</sup> YaWei Li,<sup>1</sup> Enke Liu,<sup>2</sup> YaJiao Ke,<sup>2</sup> JinLing Jin,<sup>2</sup> Yi Long,<sup>1</sup> and BaoGen Shen<sup>2</sup>

<sup>1</sup>School of Materials Science and Engineering, University of Science and Technology of Beijing, Beijing 100083, P R China.

<sup>2</sup>State Key Laboratory for Magnetism, Institute of Physics, Chinese Academy of Sciences, Beijing 100190, P R China.

[\\*zhanghu@ustb.edu.cn](mailto:*zhanghu@ustb.edu.cn)

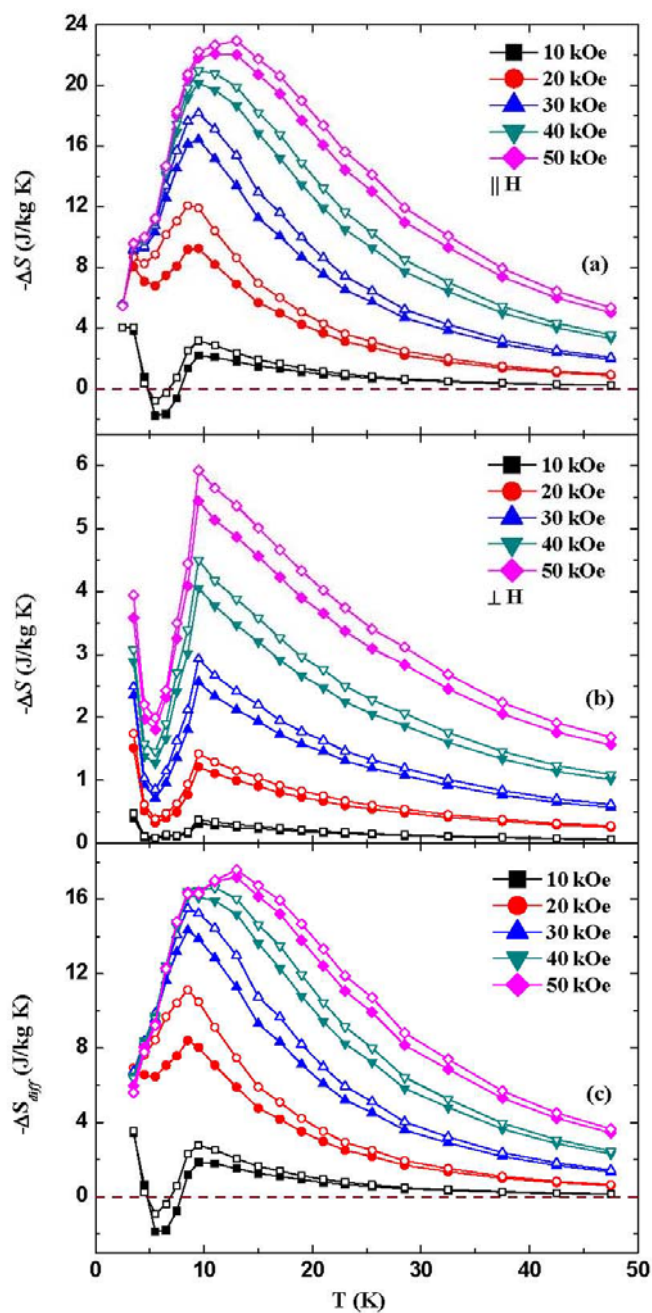

**Figure S1** | The temperature dependence of  $\Delta S$  with (open symbols) and without (full symbols) demagnetization correction for different magnetic field changes along parallel (a) and perpendicular (b) directions, respectively, and (c) the difference of  $\Delta S$  between parallel and perpendicular directions as a function of temperature.
